# Supplementary material for: Biofilm-Based Biocatalysis for Galactooligosaccharides Production by the Surface Display of β-Galactosidase in Pichia pastoris
Source: MDPI journal article supplement (doi:10.3390/ijms24076507), 2023-03-30
Supplement: s1 [file s1]

## Supplemental Figures

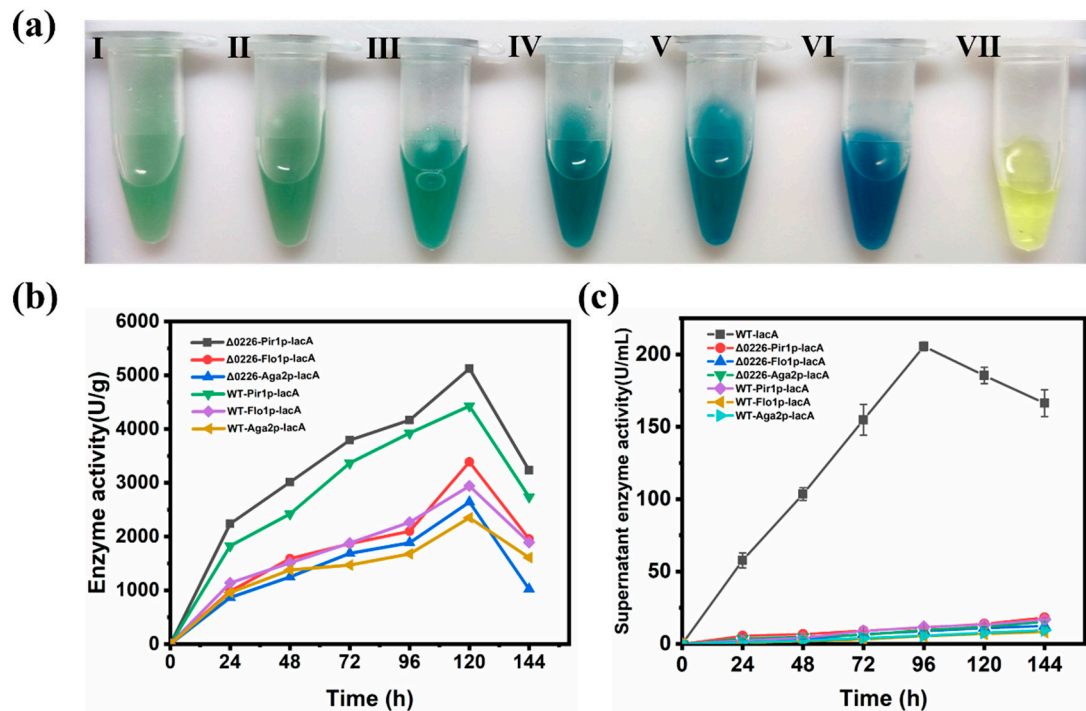

**Figure S1** Expression of enzymes from six surface-displayed engineered strains.

(a) I: WT - Aga2p-lacA, II:  $\Delta 0226$ -Aga2p-lacA, III: WT-Flo1p-lacA, IV:  $\Delta 0226$ -Flo1p-lacA, V: WT-Pir1p-lacA, VI:  $\Delta 0226$ -Pir1p-lacA, VII: control. the darker the color is, the better the expression of  $\beta$ -galactosidase. The enzyme activity of  $\Delta 0226$ -Pir1p-lacA,  $\Delta 0226$ -Flo1p-lacA,  $\Delta 0226$ -Aga2p-lacA, WT-Pir1p-lacA, WT-Flo1p-lacA, and WT-Aga2p-lacA in (b) cell precipitates and (c) supernatant, respectively. The enzymatic activity of  $\Delta 0226$ -Pir1p/ Flo1p / Aga2p -lacA was higher than that of WT-Pir1p/ Flo1p / Aga2p -lacA, indicating that knockout of  $\Delta 0226$  strain could increase the efficiency of surface display and allow more anchoring proteins to be anchored to the cell wall of *P. pastoris*.
